# Supplementary material for: Integrative study of chicken lung transcriptome to understand the host immune response during Newcastle disease virus challenge
Source: Front Cell Infect Microbiol. 2024 Sep 3;14:1368887. doi: 10.3389/fcimb.2024.1368887 (PMC11405381; doi:10.3389/fcimb.2024.1368887)
Supplement: Supplementary file 9 [file Table7.xlsx]

## Sheet: Supplementary Table 6
Supplementary Table 7: Table showing the significantly enriched KEGG and Reactome pathways identified using GSEA by Omicsbox.
Breed based analysis
A: Non-challenged 2 DPC
B: Non-challenged 6 DPC
C: Non-challenged 10 DPC
D: Challenged 2 DPC
E: Challenged 6 DPC
F: Challenged 10 DPC
Timepoint based analysis
G: Fayoumi 2 vs 10 DPC

## Sheet: A
Non-challenged 2 DPC
Database	Pathway	ID	Species	Top	#Seqs	GSEA Tag	GSEA ES	GSEA NES	Core Enrichment Sequences	No-Core Enrichment Sequences
Reactome	Vpr-mediated nuclear import of PICs	R-HSA-180910	Homo sapiens	Disease	3	BOTTOM	-0.969697	-1.83097	MSTRG.6341_NC_052535.1_23485605-23493164, LOC121107448_NC_052532.1_187753372-187760986, LOC121107447_NC_052532.1_187753952-187757184
Reactome	Autointegration results in viral DNA circles	R-HSA-177539	Homo sapiens	Disease	3	BOTTOM	-0.969697	-1.81677	MSTRG.6341_NC_052535.1_23485605-23493164, LOC121107448_NC_052532.1_187753372-187760986, LOC121107447_NC_052532.1_187753952-187757184
Reactome	Integration of viral DNA into host genomic DNA	R-HSA-175567	Homo sapiens	Disease	3	BOTTOM	-0.969697	-1.77981	MSTRG.6341_NC_052535.1_23485605-23493164, LOC121107448_NC_052532.1_187753372-187760986, LOC121107447_NC_052532.1_187753952-187757184
Reactome	2-LTR circle formation	R-HSA-164843	Homo sapiens	Disease	3	BOTTOM	-0.969697	-1.82617	MSTRG.6341_NC_052535.1_23485605-23493164, LOC121107448_NC_052532.1_187753372-187760986, LOC121107447_NC_052532.1_187753952-187757184
Reactome	Binding and entry of HIV virion	R-HSA-173107	Homo sapiens	Disease	3	BOTTOM	-0.969697	-1.8428	MSTRG.6341_NC_052535.1_23485605-23493164, LOC121107448_NC_052532.1_187753372-187760986, LOC121107447_NC_052532.1_187753952-187757184
Reactome	Assembly Of The HIV Virion	R-HSA-175474	Homo sapiens	Disease	3	BOTTOM	-0.969697	-1.81312	MSTRG.6341_NC_052535.1_23485605-23493164, LOC121107448_NC_052532.1_187753372-187760986, LOC121107447_NC_052532.1_187753952-187757184
Reactome	APOBEC3G mediated resistance to HIV-1 infection	R-HSA-180689	Homo sapiens	Disease	3	BOTTOM	-0.969697	-1.79631	MSTRG.6341_NC_052535.1_23485605-23493164, LOC121107448_NC_052532.1_187753372-187760986, LOC121107447_NC_052532.1_187753952-187757184
Reactome	Budding and maturation of HIV virion	R-HSA-162588	Homo sapiens	Disease	3	BOTTOM	-0.969697	-1.82746	MSTRG.6341_NC_052535.1_23485605-23493164, LOC121107448_NC_052532.1_187753372-187760986, LOC121107447_NC_052532.1_187753952-187757184
Reactome	Plus-strand DNA synthesis	R-HSA-164525	Homo sapiens	Disease	4	BOTTOM	-0.984615	-1.95174	MSTRG.6341_NC_052535.1_23485605-23493164, LOC121106447_NC_052532.1_122362811-122365677, LOC121107448_NC_052532.1_187753372-187760986, LOC121107447_NC_052532.1_187753952-187757184
Reactome	Uncoating of the HIV Virion	R-HSA-162585	Homo sapiens	Disease	3	BOTTOM	-0.969697	-1.81643	MSTRG.6341_NC_052535.1_23485605-23493164, LOC121107448_NC_052532.1_187753372-187760986, LOC121107447_NC_052532.1_187753952-187757184
Reactome	Minus-strand DNA synthesis	R-HSA-164516	Homo sapiens	Disease	7	BOTTOM	-0.887332	-2.1664	MSTRG.6341_NC_052535.1_23485605-23493164, LOC121106447_NC_052532.1_122362811-122365677, MSTRG.10381_NC_052540.1_11531476-11538958, TC2N_NC_052536.1_43944201-43975276, LOC121107448_NC_052532.1_187753372-187760986, LOC121107447_NC_052532.1_187753952-187757184	MSTRG.5678_NC_052534.1_96789165-96861709
Reactome	VxPx cargo-targeting to cilium	R-GGA-5620916	Gallus gallus	Organelle biogenesis and maintenance	1	TOP	0.985294	1.28969	SEPT2_NC_052540.1_4638065-4657445

## Sheet: B
Non-challenged 6 DPC
Database	Pathway	ID	Species	Top	#Seqs	GSEA Tag	GSEA ES	GSEA NES	Core Enrichment Sequences	No-Core Enrichment Sequences
KEGG	Thiamine metabolism	ko00730	None	Metabolism	1	TOP	1	1.32938	SEPT2_NC_052540.1_4638065-4657445
KEGG	Purine metabolism	ko00230	None	Metabolism	1	TOP	1	1.3429	SEPT2_NC_052540.1_4638065-4657445
Reactome	Uncoating of the HIV Virion	R-HSA-162585	Homo sapiens	Disease	3	BOTTOM	-0.959184	-1.70826	MSTRG.6341_NC_052535.1_23485605-23493164, LOC121107448_NC_052532.1_187753372-187760986, LOC121107447_NC_052532.1_187753952-187757184
Reactome	Budding and maturation of HIV virion	R-HSA-162588	Homo sapiens	Disease	3	BOTTOM	-0.959184	-1.74481	MSTRG.6341_NC_052535.1_23485605-23493164, LOC121107448_NC_052532.1_187753372-187760986, LOC121107447_NC_052532.1_187753952-187757184
Reactome	APOBEC3G mediated resistance to HIV-1 infection	R-HSA-180689	Homo sapiens	Disease	3	BOTTOM	-0.959184	-1.75088	MSTRG.6341_NC_052535.1_23485605-23493164, LOC121107448_NC_052532.1_187753372-187760986, LOC121107447_NC_052532.1_187753952-187757184
Reactome	Assembly Of The HIV Virion	R-HSA-175474	Homo sapiens	Disease	3	BOTTOM	-0.959184	-1.76723	MSTRG.6341_NC_052535.1_23485605-23493164, LOC121107448_NC_052532.1_187753372-187760986, LOC121107447_NC_052532.1_187753952-187757184
Reactome	Binding and entry of HIV virion	R-HSA-173107	Homo sapiens	Disease	3	BOTTOM	-0.959184	-1.7221	MSTRG.6341_NC_052535.1_23485605-23493164, LOC121107448_NC_052532.1_187753372-187760986, LOC121107447_NC_052532.1_187753952-187757184
Reactome	2-LTR circle formation	R-HSA-164843	Homo sapiens	Disease	3	BOTTOM	-0.959184	-1.74308	MSTRG.6341_NC_052535.1_23485605-23493164, LOC121107448_NC_052532.1_187753372-187760986, LOC121107447_NC_052532.1_187753952-187757184
Reactome	Integration of viral DNA into host genomic DNA	R-HSA-175567	Homo sapiens	Disease	3	BOTTOM	-0.959184	-1.77957	MSTRG.6341_NC_052535.1_23485605-23493164, LOC121107448_NC_052532.1_187753372-187760986, LOC121107447_NC_052532.1_187753952-187757184
Reactome	Autointegration results in viral DNA circles	R-HSA-177539	Homo sapiens	Disease	3	BOTTOM	-0.959184	-1.80181	MSTRG.6341_NC_052535.1_23485605-23493164, LOC121107448_NC_052532.1_187753372-187760986, LOC121107447_NC_052532.1_187753952-187757184
Reactome	Vpr-mediated nuclear import of PICs	R-HSA-180910	Homo sapiens	Disease	3	BOTTOM	-0.959184	-1.74578	MSTRG.6341_NC_052535.1_23485605-23493164, LOC121107448_NC_052532.1_187753372-187760986, LOC121107447_NC_052532.1_187753952-187757184
Reactome	Plus-strand DNA synthesis	R-HSA-164525	Homo sapiens	Disease	4	BOTTOM	-0.979167	-1.96831	MSTRG.6341_NC_052535.1_23485605-23493164, LOC121106447_NC_052532.1_122362811-122365677, LOC121107448_NC_052532.1_187753372-187760986, LOC121107447_NC_052532.1_187753952-187757184
Reactome	Minus-strand DNA synthesis	R-HSA-164516	Homo sapiens	Disease	6	BOTTOM	-0.838083	-1.98043	LOC121106447_NC_052532.1_122362811-122365677, MSTRG.10381_NC_052540.1_11531476-11538958, TC2N_NC_052536.1_43944201-43975276, LOC121107448_NC_052532.1_187753372-187760986, LOC121107447_NC_052532.1_187753952-187757184	IFI6_NC_052533.1_89340033-89343529

## Sheet: C
Non-challenged 10 DPC
Database	Pathway	ID	Species	Top	#Seqs	GSEA Tag	GSEA ES	GSEA NES	Core Enrichment Sequences	No-Core Enrichment Sequences
Reactome	Post-translational modification: synthesis of GPI-anchored proteins	R-GGA-163125	Gallus gallus	Metabolism of proteins	5	TOP	0.738067	1.78939	GPIHBP1_NC_052533.1_147186683-147190753, MSTRG.13404_NC_052547.1_1234953-1559018, LY6E_NC_052533.1_147255543-147261927	MHCY4_NC_052547.1_1467516-1755855, MSTRG.13517_NC_052547.1_2213394-2216408
Reactome	DAP12 signaling	R-GGA-2424491	Gallus gallus	Immune System	4	TOP	0.689906	1.52354	MSTRG.10718_NC_052541.1_1355706-1362878, MSTRG.13404_NC_052547.1_1234953-1559018	MHCY4_NC_052547.1_1467516-1755855, MSTRG.13517_NC_052547.1_2213394-2216408
Reactome	Vpr-mediated nuclear import of PICs	R-HSA-180910	Homo sapiens	Disease	3	BOTTOM	-0.985714	-1.89993	MSTRG.6341_NC_052535.1_23485605-23493164, LOC121107448_NC_052532.1_187753372-187760986, LOC121107447_NC_052532.1_187753952-187757184
Reactome	Autointegration results in viral DNA circles	R-HSA-177539	Homo sapiens	Disease	3	BOTTOM	-0.985714	-1.934	MSTRG.6341_NC_052535.1_23485605-23493164, LOC121107448_NC_052532.1_187753372-187760986, LOC121107447_NC_052532.1_187753952-187757184
Reactome	Integration of viral DNA into host genomic DNA	R-HSA-175567	Homo sapiens	Disease	3	BOTTOM	-0.985714	-1.91073	MSTRG.6341_NC_052535.1_23485605-23493164, LOC121107448_NC_052532.1_187753372-187760986, LOC121107447_NC_052532.1_187753952-187757184
Reactome	2-LTR circle formation	R-HSA-164843	Homo sapiens	Disease	3	BOTTOM	-0.985714	-1.90662	MSTRG.6341_NC_052535.1_23485605-23493164, LOC121107448_NC_052532.1_187753372-187760986, LOC121107447_NC_052532.1_187753952-187757184
Reactome	Binding and entry of HIV virion	R-HSA-173107	Homo sapiens	Disease	3	BOTTOM	-0.985714	-1.87529	MSTRG.6341_NC_052535.1_23485605-23493164, LOC121107448_NC_052532.1_187753372-187760986, LOC121107447_NC_052532.1_187753952-187757184
Reactome	Assembly Of The HIV Virion	R-HSA-175474	Homo sapiens	Disease	3	BOTTOM	-0.985714	-1.9041	MSTRG.6341_NC_052535.1_23485605-23493164, LOC121107448_NC_052532.1_187753372-187760986, LOC121107447_NC_052532.1_187753952-187757184
Reactome	APOBEC3G mediated resistance to HIV-1 infection	R-HSA-180689	Homo sapiens	Disease	3	BOTTOM	-0.985714	-1.92145	MSTRG.6341_NC_052535.1_23485605-23493164, LOC121107448_NC_052532.1_187753372-187760986, LOC121107447_NC_052532.1_187753952-187757184
Reactome	Budding and maturation of HIV virion	R-HSA-162588	Homo sapiens	Disease	3	BOTTOM	-0.985714	-1.85782	MSTRG.6341_NC_052535.1_23485605-23493164, LOC121107448_NC_052532.1_187753372-187760986, LOC121107447_NC_052532.1_187753952-187757184
Reactome	Plus-strand DNA synthesis	R-HSA-164525	Homo sapiens	Disease	4	BOTTOM	-0.992806	-2.09373	MSTRG.6341_NC_052535.1_23485605-23493164, LOC121106447_NC_052532.1_122362811-122365677, LOC121107448_NC_052532.1_187753372-187760986, LOC121107447_NC_052532.1_187753952-187757184
Reactome	Uncoating of the HIV Virion	R-HSA-162585	Homo sapiens	Disease	3	BOTTOM	-0.985714	-1.89666	MSTRG.6341_NC_052535.1_23485605-23493164, LOC121107448_NC_052532.1_187753372-187760986, LOC121107447_NC_052532.1_187753952-187757184
Reactome	Minus-strand DNA synthesis	R-HSA-164516	Homo sapiens	Disease	7	BOTTOM	-0.862991	-2.21845	LOC121106447_NC_052532.1_122362811-122365677, MSTRG.10381_NC_052540.1_11531476-11538958, VGLL4_NC_052543.1_4676383-4760528, LOC121107448_NC_052532.1_187753372-187760986, LOC121107447_NC_052532.1_187753952-187757184	MSTRG.5678_NC_052534.1_96789165-96861709, IFI6_NC_052533.1_89340033-89343529

## Sheet: D
Challenged 2 DPC
Database	Pathway	ID	Species	Top	#Seqs	GSEA Tag	GSEA ES	GSEA NES	Core Enrichment Sequences	No-Core Enrichment Sequences
Reactome	Minus-strand DNA synthesis	R-HSA-164516	Homo sapiens	Disease	6	BOTTOM	-0.893783	-2.02593	MSTRG.5678_NC_052534.1_96789165-96861709, LOC121106447_NC_052532.1_122362811-122365677, MSTRG.10381_NC_052540.1_11531476-11538958, LOC121107448_NC_052532.1_187753372-187760986, LOC121107447_NC_052532.1_187753952-187757184	TC2N_NC_052536.1_43944201-43975276
Reactome	Plus-strand DNA synthesis	R-HSA-164525	Homo sapiens	Disease	4	BOTTOM	-0.979592	-1.90742	MSTRG.6341_NC_052535.1_23485605-23493164, LOC121106447_NC_052532.1_122362811-122365677, LOC121107448_NC_052532.1_187753372-187760986, LOC121107447_NC_052532.1_187753952-187757184
Reactome	APOBEC3G mediated resistance to HIV-1 infection	R-HSA-180689	Homo sapiens	Disease	3	BOTTOM	-0.96	-1.76143	MSTRG.6341_NC_052535.1_23485605-23493164, LOC121107448_NC_052532.1_187753372-187760986, LOC121107447_NC_052532.1_187753952-187757184
Reactome	Vpr-mediated nuclear import of PICs	R-HSA-180910	Homo sapiens	Disease	3	BOTTOM	-0.96	-1.73834	MSTRG.6341_NC_052535.1_23485605-23493164, LOC121107448_NC_052532.1_187753372-187760986, LOC121107447_NC_052532.1_187753952-187757184
Reactome	Binding and entry of HIV virion	R-HSA-173107	Homo sapiens	Disease	3	BOTTOM	-0.96	-1.73325	MSTRG.6341_NC_052535.1_23485605-23493164, LOC121107448_NC_052532.1_187753372-187760986, LOC121107447_NC_052532.1_187753952-187757184
Reactome	Assembly Of The HIV Virion	R-HSA-175474	Homo sapiens	Disease	3	BOTTOM	-0.96	-1.7317	MSTRG.6341_NC_052535.1_23485605-23493164, LOC121107448_NC_052532.1_187753372-187760986, LOC121107447_NC_052532.1_187753952-187757184
Reactome	2-LTR circle formation	R-HSA-164843	Homo sapiens	Disease	3	BOTTOM	-0.96	-1.72986	MSTRG.6341_NC_052535.1_23485605-23493164, LOC121107448_NC_052532.1_187753372-187760986, LOC121107447_NC_052532.1_187753952-187757184
Reactome	Autointegration results in viral DNA circles	R-HSA-177539	Homo sapiens	Disease	3	BOTTOM	-0.96	-1.72901	MSTRG.6341_NC_052535.1_23485605-23493164, LOC121107448_NC_052532.1_187753372-187760986, LOC121107447_NC_052532.1_187753952-187757184
Reactome	Uncoating of the HIV Virion	R-HSA-162585	Homo sapiens	Disease	3	BOTTOM	-0.96	-1.72254	MSTRG.6341_NC_052535.1_23485605-23493164, LOC121107448_NC_052532.1_187753372-187760986, LOC121107447_NC_052532.1_187753952-187757184
Reactome	Integration of viral DNA into host genomic DNA	R-HSA-175567	Homo sapiens	Disease	3	BOTTOM	-0.96	-1.69972	MSTRG.6341_NC_052535.1_23485605-23493164, LOC121107448_NC_052532.1_187753372-187760986, LOC121107447_NC_052532.1_187753952-187757184
Reactome	Budding and maturation of HIV virion	R-HSA-162588	Homo sapiens	Disease	3	BOTTOM	-0.96	-1.69827	MSTRG.6341_NC_052535.1_23485605-23493164, LOC121107448_NC_052532.1_187753372-187760986, LOC121107447_NC_052532.1_187753952-187757184

## Sheet: E
Challenged 6 DPC
Database	Pathway	ID	Species	Top	#Seqs	GSEA Tag	GSEA ES	GSEA NES	Core Enrichment Sequences	No-Core Enrichment Sequences
KEGG	Thiamine metabolism	ko00730	None	Metabolism	1	TOP	0.926829	1.22082	SEPT2_NC_052540.1_4638065-4657445
Reactome	Vpr-mediated nuclear import of PICs	R-HSA-180910	Homo sapiens	Disease	3	BOTTOM	-0.948718	-1.61768	MSTRG.6341_NC_052535.1_23485605-23493164, LOC121107448_NC_052532.1_187753372-187760986, LOC121107447_NC_052532.1_187753952-187757184
Reactome	Autointegration results in viral DNA circles	R-HSA-177539	Homo sapiens	Disease	3	BOTTOM	-0.948718	-1.63619	MSTRG.6341_NC_052535.1_23485605-23493164, LOC121107448_NC_052532.1_187753372-187760986, LOC121107447_NC_052532.1_187753952-187757184
Reactome	Integration of viral DNA into host genomic DNA	R-HSA-175567	Homo sapiens	Disease	3	BOTTOM	-0.948718	-1.62633	MSTRG.6341_NC_052535.1_23485605-23493164, LOC121107448_NC_052532.1_187753372-187760986, LOC121107447_NC_052532.1_187753952-187757184
Reactome	2-LTR circle formation	R-HSA-164843	Homo sapiens	Disease	3	BOTTOM	-0.948718	-1.68626	MSTRG.6341_NC_052535.1_23485605-23493164, LOC121107448_NC_052532.1_187753372-187760986, LOC121107447_NC_052532.1_187753952-187757184
Reactome	Binding and entry of HIV virion	R-HSA-173107	Homo sapiens	Disease	3	BOTTOM	-0.948718	-1.64268	MSTRG.6341_NC_052535.1_23485605-23493164, LOC121107448_NC_052532.1_187753372-187760986, LOC121107447_NC_052532.1_187753952-187757184
Reactome	Assembly Of The HIV Virion	R-HSA-175474	Homo sapiens	Disease	3	BOTTOM	-0.948718	-1.62271	MSTRG.6341_NC_052535.1_23485605-23493164, LOC121107448_NC_052532.1_187753372-187760986, LOC121107447_NC_052532.1_187753952-187757184
Reactome	APOBEC3G mediated resistance to HIV-1 infection	R-HSA-180689	Homo sapiens	Disease	3	BOTTOM	-0.948718	-1.66866	MSTRG.6341_NC_052535.1_23485605-23493164, LOC121107448_NC_052532.1_187753372-187760986, LOC121107447_NC_052532.1_187753952-187757184
Reactome	Budding and maturation of HIV virion	R-HSA-162588	Homo sapiens	Disease	3	BOTTOM	-0.948718	-1.62671	MSTRG.6341_NC_052535.1_23485605-23493164, LOC121107448_NC_052532.1_187753372-187760986, LOC121107447_NC_052532.1_187753952-187757184
Reactome	Plus-strand DNA synthesis	R-HSA-164525	Homo sapiens	Disease	4	BOTTOM	-0.973684	-1.81905	MSTRG.6341_NC_052535.1_23485605-23493164, LOC121106447_NC_052532.1_122362811-122365677, LOC121107448_NC_052532.1_187753372-187760986, LOC121107447_NC_052532.1_187753952-187757184
Reactome	Uncoating of the HIV Virion	R-HSA-162585	Homo sapiens	Disease	3	BOTTOM	-0.948718	-1.66878	MSTRG.6341_NC_052535.1_23485605-23493164, LOC121107448_NC_052532.1_187753372-187760986, LOC121107447_NC_052532.1_187753952-187757184
Reactome	Minus-strand DNA synthesis	R-HSA-164516	Homo sapiens	Disease	5	BOTTOM	-0.923448	-1.81976	MSTRG.6341_NC_052535.1_23485605-23493164, LOC121106447_NC_052532.1_122362811-122365677, LOC121107448_NC_052532.1_187753372-187760986, LOC121107447_NC_052532.1_187753952-187757184	TC2N_NC_052536.1_43944201-43975276

## Sheet: F
Challenged 10 DPC
Database	Pathway	ID	Species	Top	#Seqs	GSEA Tag	GSEA ES	GSEA NES	Core Enrichment Sequences	No-Core Enrichment Sequences
Reactome	Vpr-mediated nuclear import of PICs	R-HSA-180910	Homo sapiens	Disease	3	BOTTOM	-0.948718	-1.66107	MSTRG.6341_NC_052535.1_23485605-23493164, LOC121107448_NC_052532.1_187753372-187760986, LOC121107447_NC_052532.1_187753952-187757184
Reactome	Autointegration results in viral DNA circles	R-HSA-177539	Homo sapiens	Disease	3	BOTTOM	-0.948718	-1.74983	MSTRG.6341_NC_052535.1_23485605-23493164, LOC121107448_NC_052532.1_187753372-187760986, LOC121107447_NC_052532.1_187753952-187757184
Reactome	Integration of viral DNA into host genomic DNA	R-HSA-175567	Homo sapiens	Disease	3	BOTTOM	-0.948718	-1.66722	MSTRG.6341_NC_052535.1_23485605-23493164, LOC121107448_NC_052532.1_187753372-187760986, LOC121107447_NC_052532.1_187753952-187757184
Reactome	2-LTR circle formation	R-HSA-164843	Homo sapiens	Disease	3	BOTTOM	-0.948718	-1.6857	MSTRG.6341_NC_052535.1_23485605-23493164, LOC121107448_NC_052532.1_187753372-187760986, LOC121107447_NC_052532.1_187753952-187757184
Reactome	Binding and entry of HIV virion	R-HSA-173107	Homo sapiens	Disease	3	BOTTOM	-0.948718	-1.71228	MSTRG.6341_NC_052535.1_23485605-23493164, LOC121107448_NC_052532.1_187753372-187760986, LOC121107447_NC_052532.1_187753952-187757184
Reactome	Assembly Of The HIV Virion	R-HSA-175474	Homo sapiens	Disease	3	BOTTOM	-0.948718	-1.69571	MSTRG.6341_NC_052535.1_23485605-23493164, LOC121107448_NC_052532.1_187753372-187760986, LOC121107447_NC_052532.1_187753952-187757184
Reactome	APOBEC3G mediated resistance to HIV-1 infection	R-HSA-180689	Homo sapiens	Disease	3	BOTTOM	-0.948718	-1.70926	MSTRG.6341_NC_052535.1_23485605-23493164, LOC121107448_NC_052532.1_187753372-187760986, LOC121107447_NC_052532.1_187753952-187757184
Reactome	Budding and maturation of HIV virion	R-HSA-162588	Homo sapiens	Disease	3	BOTTOM	-0.948718	-1.74052	MSTRG.6341_NC_052535.1_23485605-23493164, LOC121107448_NC_052532.1_187753372-187760986, LOC121107447_NC_052532.1_187753952-187757184
Reactome	Plus-strand DNA synthesis	R-HSA-164525	Homo sapiens	Disease	4	BOTTOM	-0.973684	-1.88055	MSTRG.6341_NC_052535.1_23485605-23493164, LOC121106447_NC_052532.1_122362811-122365677, LOC121107448_NC_052532.1_187753372-187760986, LOC121107447_NC_052532.1_187753952-187757184
Reactome	Uncoating of the HIV Virion	R-HSA-162585	Homo sapiens	Disease	3	BOTTOM	-0.948718	-1.66728	MSTRG.6341_NC_052535.1_23485605-23493164, LOC121107448_NC_052532.1_187753372-187760986, LOC121107447_NC_052532.1_187753952-187757184
Reactome	Minus-strand DNA synthesis	R-HSA-164516	Homo sapiens	Disease	4	BOTTOM	-0.973684	-1.92177	MSTRG.6341_NC_052535.1_23485605-23493164, LOC121106447_NC_052532.1_122362811-122365677, LOC121107448_NC_052532.1_187753372-187760986, LOC121107447_NC_052532.1_187753952-187757184

## Sheet: G
Fayoumi 2 vs 10 DPC
Database	Pathway	ID	Species	Top	#Seqs	GSEA Tag	GSEA ES	GSEA NES	Core Enrichment Sequences	No-Core Enrichment Sequences
Reactome	Erythrocytes take up oxygen and release carbon dioxide	R-GGA-1247673	Gallus gallus	Transport of small molecules	2	BOTTOM	-1	-1.40871	CA2_NC_052533.1_122451119-122468201, MSTRG.12754_NC_052545.1_12114774-12119471
Reactome	Erythrocytes take up carbon dioxide and release oxygen	R-GGA-1237044	Gallus gallus	Transport of small molecules	2	BOTTOM	-1	-1.40148	CA2_NC_052533.1_122451119-122468201, MSTRG.12754_NC_052545.1_12114774-12119471
